# Supplementary material for: Exploring the Characteristics of Circulating Tumor DNA in Pt1a Clear Cell Renal Cell Carcinoma: A Pilot Study
Source: MDPI journal article supplement (doi:10.3390/cancers15133306), 2023-06-23
Supplement: s1 [file s1]

## Supplementary Tables

**Supplementary Table S1.** Gene list of the target panel for renal cell carcinoma

|               |              |              |               |
|---------------|--------------|--------------|---------------|
| <i>ARID1A</i> | <i>BAP1</i>  | <i>EGFR</i>  | <i>ELOC</i>   |
| <i>KDM5C</i>  | <i>KDM6A</i> | <i>MET</i>   | <i>MTOR</i>   |
| <i>NF1</i>    | <i>NF2</i>   | <i>PBRM1</i> | <i>PIK3CA</i> |
| <i>PTEN</i>   | <i>SETD2</i> | <i>TP53</i>  | <i>VHL</i>    |

**Supplemental Table S2.** Sequencing statistics for plasma samples

| Stage              |         | Duplicates (%) | Average depth       | On target (%) | % Covered (>100×) | % Covered (>200×) | % Covered (>300×) | % Covered (>500×) | % Covered (>1000×) |
|--------------------|---------|----------------|---------------------|---------------|-------------------|-------------------|-------------------|-------------------|--------------------|
| pT1a<br>(n = 53)   | Median  | 83.6           | 19,946              | 59.2          | 100.0             | 99.9              | 99.7              | 97.6              | 72.6               |
|                    | [1Q-3Q] | [79.0-90.1]    | [15,694-31,820]     | [58.3-60.8]   | [99.9-100.0]      | [99.7-99.9]       | [98.9-99.8]       | [87.5-99.5]       | [2.1-86.6]         |
| pT1b<br>(n = 5)    | Median  | 83.6           | 26,966              | 59.3          | 100.0             | 99.9              | 99.8              | 98.8              | 68.1               |
|                    | [1Q-3Q] | [83.0-89.8]    | [20,356-30,886]     | [58.1-60.1]   | [100.0-100.0]     | [99.9-99.9]       | [99.7-99.8]       | [96.8-99.0]       | [67.0-80.5]        |
| pT2a<br>(n = 3)    | Median  | 85.2           | 22,399              | 58.2          | 100.0             | 99.9              | 99.9              | 99.8              | 95.9               |
|                    | [1Q-3Q] | [82.1-88.0]    | [20,993.5-45,204.5] | [57.0-60.9]   | [100.0-100.0]     | [99.9-100.0]      | [99.8-99.9]       | [98.4-99.8]       | [81.9-97.2]        |
| pT3a<br>(n = 6)    | Median  | 80.9           | 21,129.5            | 60.7          | 100.0             | 99.9              | 99.7              | 97.8              | 77.3               |
|                    | [1Q-3Q] | [77.7-84.6]    | [16,799.3-30,002.5] | [57.6-61.3]   | [100.0-100.0]     | [99.8-99.9]       | [99.6-99.7]       | [97.0-98.6]       | [77.1-89.1]        |
| M1<br>(n = 8)      | Median  | 79.7           | 18,707.5            | 57.7          | 100.0             | 99.9              | 99.9              | 99.4              | 93.1               |
|                    | [1Q-3Q] | [76.6-85.4]    | [17,526.3-26,337.8] | [56.6-58.8]   | [100.0-100.0]     | [99.9-100.0]      | [99.6-99.9]       | [98.7-99.7]       | [80.0-96.5]        |
| Benign<br>(n = 10) | Median  | 85.2           | 29,686.5            | 60.9          | 100.0             | 99.9              | 99.9              | 99.1              | 76.9               |
|                    | [1Q-3Q] | [83.2-89.0]    | [20,312.5-34,080.3] | [56.7-62.4]   | [100.0-100.0]     | [99.8-100.0]      | [99.7-99.9]       | [98.6-99.7]       | [70.9-93.3]        |

**Supplementary Table S3.** Information of patients with metastatic ccRCC

| ID     | Sex | Age | Tumor size (cm) | pT | Grade | ctDNA variant  |          | VAF(%) |
|--------|-----|-----|-----------------|----|-------|----------------|----------|--------|
| KC_062 | M   | 52  | 6.8             | 3a | 3     | <i>MTOR</i>    | C1483R   | 15.627 |
|        |     |     |                 |    |       | <i>VHL</i>     | L169P    | 9.489  |
|        |     |     |                 |    |       | <i>PBRM1</i>   | F1100fs  | 6.660  |
|        |     |     |                 |    |       | <i>TP53</i>    | G245C    | 6.268  |
| KC_093 | F   | 71  | 7.0             | 3a | 3     | <i>NF1</i>     | S1497fs  | 0.263  |
| KC_104 | M   | 60  | 9.0             | 3a | 4     | <i>PTEN</i>    | R130X    | 6.661  |
|        |     |     |                 |    |       | <i>PBRM1</i>   | P1272fs  | 5.235  |
|        |     |     |                 |    |       | <i>VHL</i>     | Splicing | 4.437  |
|        |     |     |                 |    |       | <i>BAP1</i>    | R114H    | 0.257  |
|        |     |     |                 |    |       | <i>NF1</i>     | D1849E   | 0.104  |
| KC_088 | M   | 81  | 11.0            | 3a | 3     | <i>TP53</i>    | C238Y    | 1.126  |
|        |     |     |                 |    |       | <i>KDM6A</i>   | L361F    | 0.737  |
| KC_032 | M   | 52  | 12.5            | 3a | 3     | <i>PBRM1</i>   | R522Q    | 1.573  |
|        |     |     |                 |    |       | <i>PTEN</i>    | K128fs   | 1.526  |
|        |     |     |                 |    |       | <i>VHL</i>     | R69fs    | 1.21   |
| KC_019 | M   | 69  | 17.0            | 3a | 4     | <i>SETD2</i>   | L1923fs  | 0.907  |
|        |     |     |                 |    |       | <i>VHL</i>     | L128P    | 0.733  |
|        |     |     |                 |    |       | <i>PTEN</i>    | R173P    | 0.595  |
|        |     |     |                 |    |       | <i>PBRM1</i>   | K907fs   | 0.370  |
| KC_087 | F   | 69  | 4.3             | 3a | 3     | Not detected - |          | -      |
| KC_065 | M   | 64  | 12.0            | 4  | 3     | Not detected - |          | -      |

Abbreviations: F, female; M, male; pT, pathological T stage; VAF, variant allele frequency

**Supplementary Table S4.** Information of patients with pT1b-3a ccRCC

| <b>ID</b> | <b>Sex</b> | <b>Age</b> | <b>Tumor size (cm)</b> | <b>pT</b> | <b>Grade</b> | <b>ctDNA variant</b> |        | <b>VAF(%)</b> |
|-----------|------------|------------|------------------------|-----------|--------------|----------------------|--------|---------------|
| KC_020    | F          | 64         | 5.4                    | 1b        | 1            | <i>TP53</i>          | Y220C  | 0.442         |
|           |            |            |                        |           |              | <i>SETD2</i>         | P2361H | 0.422         |
| KC_036    | M          | 79         | 4.1                    | 1b        | 2            | <i>EGFR</i>          | A647T  | 0.141         |
| KC_119    | F          | 51         | 6.5                    | 1b        | 2            | Not detected -       |        | -             |
| KC_060    | M          | 63         | 6.4                    | 1b        | 2            | Not detected -       |        | -             |
| KC_079    | M          | 41         | 5.5                    | 1b        | 2            | Not detected -       |        | -             |
| KC_048    | M          | 79         | 8.0                    | 2a        | 3            | <i>TP53</i>          | P153fs | 0.178         |
| KC_078    | M          | 48         | 9.0                    | 2a        | 3            | Not detected -       |        | -             |
| KC_086    | F          | 44         | 8.5                    | 2a        | 3            | Not detected -       |        | -             |
| KC_058    | M          | 86         | 9.5                    | 3a        | 4            | <i>EGFR</i>          | R958C  | 0.191         |
| KC_015    | M          | 63         | 6.9                    | 3a        | 3            | <i>PBRM1</i>         | Y1506H | 0.489         |
| KC_094    | M          | 59         | 5.5                    | 3a        | 3            | <i>NF1</i>           | P2221L | 0.167         |
| KC_113    | M          | 42         | 6.8                    | 3a        | 2            | Not detected -       |        | -             |
| KC_031    | M          | 64         | 6.5                    | 3a        | 3            | Not detected -       |        | -             |
| KC_061    | M          | 32         | 2.2                    | 3a        | 2            | Not detected -       |        | -             |

Abbreviations: F, female; M, male; pT, pathological T stage; VAF, variant allele frequency

**Supplementary Table S5.** Information of patients with benign renal tumor

| <b>ID</b> | <b>Sex</b> | <b>Age</b> | <b>Tumor size (cm)</b> | <b>Type</b>          | <b>ctDNA variant</b> |       | <b>VAF(%)</b> |
|-----------|------------|------------|------------------------|----------------------|----------------------|-------|---------------|
| KC-089    | F          | 66         | 0.7                    | Angiomyolipoma       | Not detected         | -     | -             |
| KC-092    | M          | 42         | 0.7                    | Angiomyolipoma       | Not detected         | -     | -             |
| KC-077    | F          | 47         | 0.8                    | Angiomyolipoma       | Not detected         | -     | -             |
| KC-021    | F          | 62         | 1.1                    | Angiomyolipoma       | Not detected         | -     | -             |
| KC-063    | F          | 38         | 1.5                    | Simple cortical cyst | Not detected         | -     | -             |
| KC-035    | F          | 45         | 1.6                    | Angiomyolipoma       | Not detected         | -     | -             |
| KC-033    | F          | 57         | 2.0                    | Oncocytoma           | Not detected         | -     | -             |
| KC-027    | M          | 61         | 3.3                    | Oncocytoma           | Not detected         | -     | -             |
| KC-017    | F          | 59         | 6.5                    | Angiomyolipoma       | Not detected         | -     | -             |
| KC-103    | M          | 58         | 8.0                    | Pseudocyst           | <i>MET</i>           | R426H | 0.02859       |

Abbreviations: F, female; M, male; VAF, variant allele frequency

**Supplementary Table S6.** List of ctDNA variants of patients with pT1a ccRCC

| <b>ID</b> | <b>Sex</b> | <b>Age</b> | <b>Tumor size (cm)</b> | <b>Grade</b> | <b>ctDNA variant</b> |          | <b>VAF(%)</b> |
|-----------|------------|------------|------------------------|--------------|----------------------|----------|---------------|
| KC_098    | M          | 56         | 1.2                    | 1            | <i>PIK3CA</i>        | Q1033L   | 0.115         |
| KC_101    | F          | 71         | 1.3                    | 2            | <i>KDM6A</i>         | Q367X    | 0.216         |
| KC_057    | M          | 56         | 1.7                    | 3            | <i>TP53</i>          | R196Q    | 0.453         |
| KC_004    | F          | 50         | 1.9                    | 2            | <i>PTEN</i>          | Y16X     | 0.499         |
| KC_059    | M          | 59         | 2.2                    | 2            | <i>NF1</i>           | K513X    | 0.350         |
| KC_007    | M          | 63         | 2.5                    | 2            | <i>PTEN</i>          | Splicing | 2.749         |
| KC_118    | F          | 51         | 2.8                    | 3            | <i>MET</i>           | R987Q    | 0.378         |
| KC_083    | F          | 62         | 3                      | 3            | <i>KDM6A</i>         | E1335fs  | 0.614         |
| KC_069    | M          | 68         | 3.8                    | 1            | <i>EGFR</i>          | Splicing | 0.477         |
| KC_121    | M          | 62         | 3.8                    | 4            | <i>VHL</i>           | M1I      | 0.283         |
| KC_025    | M          | 47         | 4                      | 2            | <i>PIK3CA</i>        | S235F    | 0.232         |

Abbreviations: F, female; M, male; pT, pathological T stage; VAF, variant allele frequency
